# Supplementary material for: Mitogenome Sequencing in the Genus Camelus Reveals Evidence for Purifying Selection and Long-term Divergence between Wild and Domestic Bactrian Camels
Source: PubMed Central journal article supplement (PMC5577142; doi:10.1038/s41598-017-08995-8), 2017-08-30
Supplement: 41598_2017_8995_MOESM1_ESM.pdf [file 41598_2017_8995_MOESM1_ESM.pdf]

1 **Supplementary Information**  
2  
3 **Mitogenome Sequencing in the Genus *Camelus* Reveals Evidence for Purifying**  
4 **Selection and Long-term Divergence between Wild and Domestic Bactrian**  
5 **Camels**  
6  
7 **Elmira Mohandesan, Robert R. Fitak, Jukka Corander, Adiya Yadamsuren,**  
8 **Battsetseg Chuluunbat, Omer Abdelhadi, Abdul Raziq, Peter Nagy, Gabrielle**  
9 **Stalder, Chris Walzer, Bernard Faye, Pamela A. Burger**

10 Figure S1: The mtDNA saturation analysis performed on all sites (black) in the  
11 protein-coding sequences, and first and second positions (blue). Regions of low %Ti  
12 ( $\leq 50\%$ ) corresponding to sequence divergence of around 0.23 and 0.12 were defined  
13 as likely affected by saturation.

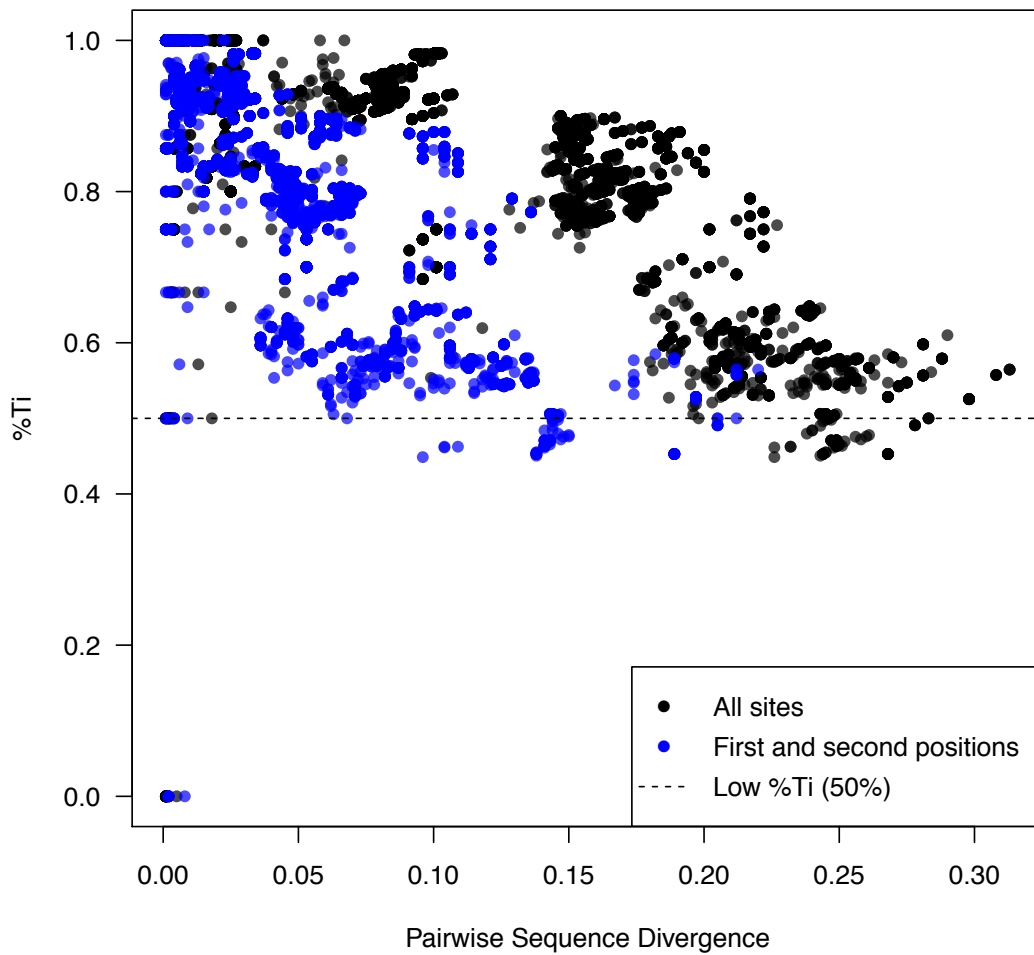

14  
15  
16

17 Table S1: List of the 24 mitochondrial genomes of Old world camelids (*C.*  
 18 *dromedarius*, *C.bactrianus*, *C.ferus*) obtained in this study. The geographic location  
 19 of samples, and the length of the recovered mtDNA for each sample are mentioned.  
 20 The Genbank accession numbers of the mtDNA of 10 different species used in this  
 21 study are also listed.  
 22

| Sample ID             | Species               | Geographical location       | GenBank ID  | Length (bp) |
|-----------------------|-----------------------|-----------------------------|-------------|-------------|
| Dromedary reference   | <i>C. dromedarius</i> | United Arab Emirates: Dubai | NC_009849.1 | 16,643      |
| Drom439 <sup>1</sup>  | <i>C. dromedarius</i> | Qatar                       | KU605072    | 16,379      |
| Drom795               | <i>C. dromedarius</i> | Saudi Arabia                | KU605073    | 16,379      |
| Drom796               | <i>C. dromedarius</i> | Saudi Arabia                | KU605074    | 16,379      |
| Drom797               | <i>C. dromedarius</i> | Saudi Arabia                | KU605075    | 16,379      |
| Drom801A <sup>2</sup> | <i>C. dromedarius</i> | Austria                     | KU605076    | 16,379      |
| Drom802               | <i>C. dromedarius</i> | UAE, Dubai                  | KU605077    | 16,379      |
| Drom806               | <i>C. dromedarius</i> | Kenya                       | KU605078    | 16,375      |
| Drom816               | <i>C. dromedarius</i> | Sudan                       | KU605079    | 16,379      |
| Drom820               | <i>C. dromedarius</i> | Pakistan                    | KU605080    | 16,379      |
| Bactrian reference    | <i>C. bactrianus</i>  | Mongolia, China             | NC_009628.2 | 16,659      |
| DC158 <sup>3</sup>    | <i>C. bactrianus</i>  | Austria                     | KU666460    | 16,385      |
| DC269                 | <i>C. bactrianus</i>  | Kazakhstan                  | KU666461    | 16,385      |
| DC399                 | <i>C. bactrianus</i>  | Mongolia                    | KU666462    | 16,385      |
| DC400                 | <i>C. bactrianus</i>  | Mongolia                    | KU666463    | 16,385      |
| DC402                 | <i>C. bactrianus</i>  | Mongolia                    | KU666464    | 16,385      |
| DC408                 | <i>C. bactrianus</i>  | Mongolia                    | KU666465    | 16,385      |
| Wild camel reference  | <i>C. ferus</i>       | Mongolia                    | NC_009629.2 | 16,680      |
| WC214                 | <i>C. ferus</i>       | Mongolia                    | KU666451    | 16,383      |
| WC216                 | <i>C. ferus</i>       | Mongolia                    | KU666452    | 16,383      |
| WC218                 | <i>C. ferus</i>       | Mongolia                    | KU666453    | 16,384      |
| WC219                 | <i>C. ferus</i>       | Mongolia                    | KU666454    | 16,383      |
| WC220                 | <i>C. ferus</i>       | Mongolia                    | KU666455    | 16,384      |
| WC247                 | <i>C. ferus</i>       | Mongolia                    | KU666456    | 16,384      |
| WC303                 | <i>C. ferus</i>       | Mongolia                    | KU666457    | 16,383      |
| WC304                 | <i>C. ferus</i>       | Mongolia                    | KU666458    | 16,383      |
| WC305                 | <i>C. ferus</i>       | Mongolia                    | KU666459    | 16,384      |
| Llama                 | <i>L. glama</i>       |                             | AP003426.1  | 16,597      |
| Guanaco               | <i>L. guanicoe</i>    |                             | NC_011822.1 | 16,649      |
| Alpaca                | <i>L. pacos</i>       |                             | Y19184.1    | 16,652      |
| Vicuna                | <i>V. vicugna</i>     |                             | NC_013558.1 | 16,084      |
| Cattle                | <i>B. taurus</i>      |                             | AF492351.1  | 16,338      |
| Tibetan Antelope      | <i>P. hodgsonii</i>   |                             | NC_007441.1 | 16,498      |
| Tibetan human         | <i>H.sapiens</i>      |                             | KF056318.1  | 16,569      |

23

24 <sup>1</sup> The individual was sampled in Jordan close to the border to Saudi Arabia, however,  
 25 its origin from Qatar was confirmed.

26 <sup>2</sup> The individual's origin can be traced back to North Africa and the Canary Islands.

27 <sup>3</sup> The individual was sampled in Austria, however, genetically (based on 20  
 28 microsatellites) it clustered with Mongolian Bactrian camels.

29 Table S2: Summary statistics of mitochondrial gene differentiation between  
 30 dromedaries and domestic Bactrian camels.  
 31

| Gene     | Length (bp) | n     | D <sub>a</sub> | D <sub>s</sub> | D <sub>n</sub> |
|----------|-------------|-------|----------------|----------------|----------------|
| ND1      | 954         | 41.1  | 0.080          | 68             | 3              |
| ND2      | 1041        | 44.3  | 0.078          | 62             | 15             |
| COX1     | 1542        | 44.8  | 0.063          | 96             | 0              |
| COX2     | 681         | 27.5  | 0.077          | 50             | 1              |
| COX3     | 783         | 29.1  | 0.069          | 48             | 2              |
| AP6      | 678         | 28.3  | 0.078          | 44             | 7              |
| AP8      | 201         | 10.1  | 0.093          | 12             | 6              |
| CYTB     | 1137        | 56.8  | 0.092          | 93             | 9              |
| ND3      | 348         | 13.4  | 0.073          | 20             | 4              |
| ND4      | 1377        | 61.5  | 0.081          | 101            | 7              |
| ND4L     | 294         | 13.6  | 0.087          | 24             | 0              |
| ND5      | 1818        | 81.8  | 0.083          | 120            | 24             |
| ND6      | 525         | 25.8  | 0.090          | 40             | 6              |
| 12S rRNA | 967         | 18.1  | 0.035          | NA             | NA             |
| 16S rRNA | 1563        | 20.1  | 0.024          | NA             | NA             |
| tRNAs    | 1508        | 22.5  | 0.027          | NA             | NA             |
| CR       | 953         | 22.3  | 0.042          | NA             | NA             |
| Total    | 16370       | 520.9 | 0.069          | 778            | 84             |

32  
 33 n = average number of nucleotide differences between species; D<sub>a</sub>: the number of net  
 34 nucleotide substitutions per site between species; D<sub>s</sub>: number of fixed synonymous  
 35 substitution between species; D<sub>n</sub>: number of fixed non-synonymous substitution  
 36 between species.  
 37

38 Table S3: Summary statistics of mitochondrial gene differentiation between  
 39 dromedaries and wild Bactrian camels.  
 40

| Gene     | Length (bp) | n     | D <sub>a</sub> | D <sub>s</sub> | D <sub>n</sub> |
|----------|-------------|-------|----------------|----------------|----------------|
| ND1      | 954         | 41.9  | 0.079          | 68             | 4              |
| ND2      | 1041        | 44.8  | 0.077          | 60             | 15             |
| COX1     | 1542        | 50.9  | 0.060          | 90             | 0              |
| COX2     | 681         | 30.3  | 0.081          | 52             | 1              |
| COX3     | 783         | 34.0  | 0.077          | 55             | 1              |
| AP6      | 678         | 28.2  | 0.077          | 44             | 7              |
| AP8      | 201         | 10.5  | 0.098          | 12             | 7              |
| CYTB     | 1137        | 61.4  | 0.099          | 95             | 15             |
| ND3      | 348         | 13.2  | 0.070          | 20             | 3              |
| ND4      | 1377        | 59.3  | 0.078          | 97             | 8              |
| ND4L     | 294         | 13.5  | 0.084          | 23             | 0              |
| ND5      | 1818        | 85.4  | 0.084          | 124            | 23             |
| ND6      | 525         | 27.7  | 0.097          | 44             | 6              |
| 12S rRNA | 967         | 20.4  | 0.038          | NA             | NA             |
| 16S rRNA | 1563        | 20.4  | 0.023          | NA             | NA             |
| tRNAs    | 1508        | 22.9  | 0.027          | NA             | NA             |
| CR       | 953         | 23.3  | 0.043          | NA             | NA             |
| Total    | 16370       | 588.9 | 0.070          | 784            | 90             |

41  
 42 n = average number of nucleotide differences between species; D<sub>a</sub>: the number of net  
 43 nucleotide substitutions per site between species; D<sub>s</sub>: number of fixed synonymous  
 44 substitution between species; D<sub>n</sub>: number of fixed non-synonymous substitution  
 45 between species.  
 46

47  
48  
49  
50

Table S4: Summary statistics of mitochondrial gene differentiation between domestic and wild Bactrian camels.

| Gene     | Length (bp) | n     | D <sub>a</sub> | D <sub>s</sub> | D <sub>n</sub> |
|----------|-------------|-------|----------------|----------------|----------------|
| ND1      | 954         | 13.6  | 0.023          | 20             | 1              |
| ND2      | 1041        | 12.9  | 0.020          | 17             | 2              |
| COX1     | 1542        | 12.1  | 0.014          | 21             | 0              |
| COX2     | 681         | 7.5   | 0.018          | 12             | 0              |
| COX3     | 783         | 10.7  | 0.022          | 16             | 1              |
| AP6      | 678         | 6.1   | 0.016          | 11             | 0              |
| AP8      | 201         | 2.9   | 0.025          | 4              | 1              |
| CYTB     | 1137        | 16.0  | 0.023          | 20             | 6              |
| ND3      | 348         | 2.6   | 0.014          | 4              | 1              |
| ND4      | 1377        | 18.4  | 0.022          | 27             | 3              |
| ND4L     | 294         | 7.3   | 0.045          | 13             | 0              |
| ND5      | 1818        | 19.3  | 0.016          | 21             | 7              |
| ND6      | 525         | 9.4   | 0.030          | 12             | 3              |
| 12S rRNA | 967         | 3.5   | 0.006          | NA             | NA             |
| 16S rRNA | 1563        | 4.8   | 0.004          | NA             | NA             |
| tRNAs    | 1508        | 6.0   | -0.00005       | NA             | NA             |
| CR       | 953         | 6.8   | 0.012          | NA             | NA             |
| Total    | 16370       | 160.7 | 0.018          | 198            | 25             |

51  
52  
53  
54  
55  
56

n = average number of nucleotide differences between species; D<sub>a</sub>: the number of net nucleotide substitutions per site between species; D<sub>s</sub>: number of fixed synonymous substitution between species; D<sub>n</sub>: number of fixed non-synonymous substitution between species.

57 Table S5: Pairwise divergence estimates of the electron transport system (ETS) complexes between the three Old world camel species.

58

| ETS complex | mitochondrial genes                 | Concatenated sequence (bp) | D <sub>a</sub> (db) | D <sub>a</sub> (df) | D <sub>a</sub> (bf) | D <sub>n</sub> (db) | D <sub>n</sub> (df) | D <sub>n</sub> (bf) | D <sub>n</sub> (per 1000 bp) |      |      |
|-------------|-------------------------------------|----------------------------|---------------------|---------------------|---------------------|---------------------|---------------------|---------------------|------------------------------|------|------|
| ETS I       | ND1, ND2, ND3, ND4L, ND4, ND5, ND6, | 6,357                      | 0.082               | 0.081               | 0.022               | 59                  | 59                  | 17                  | 9.28                         | 9.2  | 2.6  |
| ETS III     | CYTB                                | 1,137                      | 0.092               | 0.099               | 0.023               | 9                   | 15                  | 6                   | 7.91                         | 13.1 | 5.2  |
| ETS IV      | COX1 COX2 COX3                      | 3,006                      | 0.068               | 0.069               | 0.017               | 3                   | 2                   | 1                   | 0.99                         | 0.66 | 0.33 |
| ETS V       | ATP6 ATP8                           | 879                        | 0.081               | 0.082               | 0.018               | 13                  | 14                  | 1                   | 14.7                         | 15.9 | 1.13 |

59

60 D<sub>a</sub>: number of net nucleotide substitutions per site between species; D<sub>n</sub>: number of fixed nonsynonymous substitution between species; d:

61 dromedary; b: Bactrian camel and f: wild two-humped camel.

62

63

64

65 Table S6: Global MK test on 11,379 bp concatenated protein-coding genes conducted on pairwise comparisons between dromedaries,  
 66 domestic and wild Bactrian camels, respectively. The two-tailed *P*-values of Fisher's exact tests are shown. *P*-values with asterisk are  
 67 significant with the following significant levels \*  $P < 0.05$ ; \*\*  $P < 0.01$ .  
 68

|                                   | Synonymous Substitutions               |                                  | Non-synonymous Substitutions           |                                  | Neutrality index (NI) | <i>P</i> -value |
|-----------------------------------|----------------------------------------|----------------------------------|----------------------------------------|----------------------------------|-----------------------|-----------------|
|                                   | Fixed differences between species (Ds) | Polymorphic sites among all (Ps) | Fixed differences between species (Dn) | Polymorphic sites among all (Pn) |                       |                 |
| dromedary vs. domestic Bactrian   | 778                                    | 125                              | 84                                     | 27                               | 2                     | 0.006**         |
| dromedary vs. wild Bactrian camel | 784                                    | 123                              | 90                                     | 20                               | 1.41                  | 0.244           |
| domestic vs. wild Bactrian camel  | 198                                    | 62                               | 25                                     | 17                               | 2.17                  | 0.035*          |
| One- vs two-humped camels         | 678                                    | 348                              | 75                                     | 57                               | 1.48                  | 0.041*          |

69  
70



71 Table S7: Polymorphisms within *C. dromedarius* species and divergence to *C. bactrianus* at synonymous and nonsynonymous positions  
72 in the mitochondrial protein coding genes. The two-tailed *P*-values of Fisher's exact tests are shown. *P*-values with asterisk are  
73 significant with significance level of \*\*  $P < 0.01$ .  
74

|                    | Fixed synonymous differences (Ds) | Synonymous polymorphic sites (Ps) | Fixed nonsynonymous differences (Dn) | Nonsynonymous polymorphic sites (Pn) | Neutrality index | <i>P</i> -value |
|--------------------|-----------------------------------|-----------------------------------|--------------------------------------|--------------------------------------|------------------|-----------------|
| ND1                | 68                                | 8                                 | 3                                    | 1                                    | 2.83             | 0.385           |
| ND2                | 62                                | 9                                 | 15                                   | 2                                    | 0.91             | 1               |
| COX1               | 96                                | 11                                | 0                                    | 0                                    | -                | 1               |
| COX2               | 50                                | 4                                 | 1                                    | 0                                    | 0                | 1               |
| ATP8               | 12                                | 0                                 | 6                                    | 1                                    | -                | 0.368           |
| ATP6               | 44                                | 5                                 | 7                                    | 1                                    | 1.25             | 1               |
| COX3               | 48                                | 8                                 | 2                                    | 0                                    | 0                | 1               |
| ND3                | 20                                | 3                                 | 4                                    | 0                                    | 0                | 1               |
| ND4L               | 24                                | 2                                 | 0                                    | 0                                    | -                | 1               |
| ND4                | 101                               | 15                                | 7                                    | 2                                    | 1.92             | 0.352           |
| ND5                | 120                               | 17                                | 24                                   | 4                                    | 1.17             | 0.759           |
| ND6                | 40                                | 2                                 | 6                                    | 4                                    | 13.33            | 0.009**         |
| CYTB               | 93                                | 9                                 | 9                                    | 0                                    | 0                | 1               |
| Concatenated genes | 778                               | 93                                | 84                                   | 15                                   | 1.49             | 0.178           |

75  
76

77 Table S8: Polymorphism within *C. dromedarius* and divergence to *C. ferus* at synonymous and nonsynonymous positions in protein  
 78 coding genes in mtDNA. The two-tailed *P*-values of Fisher's exact tests are shown. The *P*-values with asterisk are significant with  
 79 significance level of \*\*  $P < 0.01$ .  
 80

|                    | Fixed synonymous differences (Ds) | Synonymous polymorphic sites (Ps) | Fixed nonsynonymous differences (Dn) | Nonsynonymous polymorphic sites (Pn) | Neutrality index | <i>P</i> -value |
|--------------------|-----------------------------------|-----------------------------------|--------------------------------------|--------------------------------------|------------------|-----------------|
| ND1                | 68                                | 8                                 | 4                                    | 1                                    | 2.12             | 0.453           |
| ND2                | 60                                | 9                                 | 15                                   | 2                                    | 0.88             | 1               |
| COX1               | 90                                | 11                                | 0                                    | 0                                    | -                | 1               |
| COX2               | 52                                | 4                                 | 1                                    | 0                                    | 0                | 1               |
| ATP8               | 12                                | 0                                 | 7                                    | 1                                    | -                | 0.4             |
| ATP6               | 44                                | 5                                 | 7                                    | 1                                    | 1.25             | 1               |
| COX3               | 55                                | 8                                 | 1                                    | 0                                    | 0                | 1               |
| ND3                | 20                                | 3                                 | 3                                    | 0                                    | 0                | 1               |
| ND4L               | 23                                | 2                                 | 0                                    | 0                                    | -                | 1               |
| ND4                | 97                                | 15                                | 8                                    | 2                                    | 1.61             | 0.629           |
| ND5                | 124                               | 17                                | 23                                   | 4                                    | 1.26             | 0.750           |
| ND6                | 44                                | 2                                 | 6                                    | 4                                    | 14.66            | 0.007**         |
| CYTB               | 95                                | 9                                 | 15                                   | 0                                    | 0                | 0.600           |
| Concatenated genes | 784                               | 93                                | 90                                   | 15                                   | 1.40             | 0.249           |

81  
82

83 Table S9: Polymorphism within *C. bactrianus* and divergence to *C. dromedarius* at synonymous and nonsynonymous positions in protein  
 84 coding genes in mtDNA. The two-tailed *P*-values of Fisher's exact tests are shown. The *P*-values with asterisk are significant with  
 85 significance level of \*\*  $P < 0.01$ .  
 86

|                    | Fixed synonymous differences (Ds) | Synonymous polymorphic sites (Ps) | Fixed nonsynonymous differences (Dn) | Nonsynonymous polymorphic sites (Pn) | Neutrality index | <i>P</i> -value |
|--------------------|-----------------------------------|-----------------------------------|--------------------------------------|--------------------------------------|------------------|-----------------|
| ND1                | 68                                | 3                                 | 3                                    | 1                                    | 7.55             | 0.200           |
| ND2                | 62                                | 4                                 | 15                                   | 1                                    | 1.03             | 1               |
| COX1               | 96                                | 0                                 | 0                                    | 0                                    | -                | 1               |
| COX2               | 50                                | 0                                 | 1                                    | 0                                    | -                | 1               |
| ATP8               | 12                                | 1                                 | 6                                    | 1                                    | 2                | 1               |
| ATP6               | 44                                | 2                                 | 7                                    | 0                                    | 0                | 1               |
| COX3               | 48                                | 0                                 | 2                                    | 2                                    | -                | 0.004           |
| ND3                | 20                                | 0                                 | 4                                    | 0                                    | -                | 1               |
| ND4L               | 24                                | 1                                 | 0                                    | 0                                    | -                | 1               |
| ND4                | 101                               | 8                                 | 7                                    | 1                                    | 1.80             | 0.483           |
| ND5                | 120                               | 3                                 | 24                                   | 3                                    | 5                | 0.071           |
| ND6                | 40                                | 4                                 | 6                                    | 0                                    | 0                | 1               |
| CYTB               | 93                                | 6                                 | 9                                    | 3                                    | 5.16             | 0.056           |
| Concatenated genes | 778                               | 32                                | 84                                   | 12                                   | 3.47             | 0.001**         |

87  
88

89 Table S10: Polymorphism within *C. bactrianus* and divergence to *C. ferus* at synonymous and nonsynonymous positions in protein  
 90 coding genes in mtDNA. The two-tailed *P*-values of Fisher's exact tests are shown. The *P*-values with asterisk are significant with  
 91 significance level of \*\*  $P < 0.01$ .  
 92

|                    | Fixed synonymous differences (Ds) | Synonymous polymorphic sites (Ps) | Fixed nonsynonymous differences (Dn) | Nonsynonymous polymorphic sites (Pn) | Neutrality index | <i>P</i> -value |
|--------------------|-----------------------------------|-----------------------------------|--------------------------------------|--------------------------------------|------------------|-----------------|
| ND1                | 20                                | 3                                 | 1                                    | 1                                    | 6.66             | 0.300           |
| ND2                | 17                                | 4                                 | 2                                    | 1                                    | 2.12             | 0.521           |
| COX1               | 21                                | 0                                 | 0                                    | 0                                    | -                | 1               |
| COX2               | 12                                | 0                                 | 0                                    | 0                                    | -                | 1               |
| ATP8               | 4                                 | 1                                 | 1                                    | 1                                    | 4                | 1               |
| ATP6               | 11                                | 2                                 | 0                                    | 0                                    | -                | 1               |
| COX3               | 16                                | 0                                 | 1                                    | 2                                    | -                | 0.017           |
| ND3                | 4                                 | 0                                 | 1                                    | 0                                    | -                | 1               |
| ND4L               | 13                                | 1                                 | 0                                    | 0                                    | -                | 1               |
| ND4                | 27                                | 8                                 | 3                                    | 1                                    | 1.12             | 1               |
| ND5                | 21                                | 3                                 | 7                                    | 3                                    | 3                | 0.328           |
| ND6                | 12                                | 4                                 | 3                                    | 0                                    | 0                | 1               |
| CYTB               | 20                                | 6                                 | 6                                    | 3                                    | 1.66             | 0.664           |
| Concatenated genes | 198                               | 32                                | 25                                   | 12                                   | 2.97             | 0.008**         |

93  
 94

95 Table S11: Polymorphism within *C. ferus* and divergence to *C. dromedarius* at synonymous and nonsynonymous positions in protein  
 96 coding genes in mtDNA. The two-tailed *P*-values of Fisher's exact tests are shown.  
 97

|                    | Fixed synonymous differences (Ds) | Synonymous polymorphic sites (Ps) | Fixed nonsynonymous differences (Dn) | Nonsynonymous polymorphic sites (Pn) | Neutrality index | <i>P</i> -value |
|--------------------|-----------------------------------|-----------------------------------|--------------------------------------|--------------------------------------|------------------|-----------------|
| ND1                | 68                                | 4                                 | 4                                    | 0                                    | 0                | 1               |
| ND2                | 60                                | 4                                 | 15                                   | 1                                    | 1                | 1               |
| COX1               | 90                                | 3                                 | 0                                    | 0                                    | -                | 1               |
| COX2               | 52                                | 3                                 | 1                                    | 0                                    | 0                | 1               |
| ATP8               | 12                                | 0                                 | 7                                    | 0                                    | -                | 1               |
| ATP6               | 44                                | 0                                 | 7                                    | 0                                    | -                | 1               |
| COX3               | 55                                | 4                                 | 1                                    | 0                                    | 0                | 1               |
| ND3                | 20                                | 0                                 | 3                                    | 1                                    | -                | 0.166           |
| ND4L               | 23                                | 1                                 | 0                                    | 0                                    | -                | 1               |
| ND4                | 97                                | 2                                 | 8                                    | 0                                    | 0                | 1               |
| ND5                | 124                               | 7                                 | 23                                   | 1                                    | 0.77             | 1               |
| ND6                | 44                                | 0                                 | 6                                    | 1                                    | -                | 0.137           |
| CYTB               | 95                                | 2                                 | 15                                   | 1                                    | 3.16             | 0.370           |
| Concatenated genes | 784                               | 30                                | 90                                   | 5                                    | 1.45             | 0.401           |

98  
99

100 Table S12: Polymorphism within *C. ferus* and divergence to *C. bactrianus* at synonymous and nonsynonymous positions in protein  
 101 coding genes in mtDNA. The two-tailed *P*-values of Fisher's exact tests are shown.  
 102

|                    | Fixed synonymous differences (Ds) | Synonymous polymorphic sites (Ps) | Fixed nonsynonymous differences (Dn) | Nonsynonymous polymorphic sites (Pn) | Neutrality index | <i>P</i> -value |
|--------------------|-----------------------------------|-----------------------------------|--------------------------------------|--------------------------------------|------------------|-----------------|
| ND1                | 20                                | 4                                 | 1                                    | 0                                    | 0                | 1               |
| ND2                | 17                                | 4                                 | 2                                    | 1                                    | 2.12             | 0.521           |
| COX1               | 21                                | 3                                 | 0                                    | 0                                    | -                | 1               |
| COX2               | 12                                | 3                                 | 0                                    | 0                                    | -                | 1               |
| ATP8               | 4                                 | 0                                 | 1                                    | 0                                    | -                | 1               |
| ATP6               | 11                                | 0                                 | 0                                    | 0                                    | -                | 1               |
| COX3               | 16                                | 4                                 | 1                                    | 0                                    | 0                | 1               |
| ND3                | 4                                 | 0                                 | 1                                    | 1                                    | -                | 0.333           |
| ND4L               | 13                                | 1                                 | 0                                    | 0                                    | -                | 1               |
| ND4                | 27                                | 2                                 | 3                                    | 0                                    | 0                | 1               |
| ND5                | 21                                | 7                                 | 7                                    | 1                                    | 0.42             | 0.651           |
| ND6                | 12                                | 0                                 | 3                                    | 1                                    | -                | 0.25            |
| CYTB               | 20                                | 2                                 | 6                                    | 1                                    | 1.66             | 1               |
| Concatenated genes | 198                               | 30                                | 25                                   | 5                                    | 1.32             | 0.574           |

103

104 Table S13: Potential positively selected sites detected by branch-site model A  
 105 implemented in CODEML (PAML) with the correspondent Bayes empirical Bayes  
 106 (BEB) values. The significance of the detection of sites under positive selection on  
 107 each of the selected branch was assessed by Likelihood Ratio Test (LRT). n.s: non  
 108 significant values of LRT. \*Posterior probability in BEB > 95%, Posterior probability  
 109 50% - 95% without asterisk.  
 110

| Foreground branch      | Gene            | Codon | Amino acid | BEB    | $\Delta$ LRT | d.f | P-value |
|------------------------|-----------------|-------|------------|--------|--------------|-----|---------|
| <i>C. dromedarius</i>  | ND2             | 98    | V          | 0.517  | 0            | 1   | n.s     |
|                        |                 | 219   | L          | 0.504  | 0            | 1   | n.s     |
|                        | ATP6            | 1     | V          | 0.671  | 0            | 1   | n.s     |
|                        |                 | 38    | V          | 0.592  | 0            | 1   | n.s     |
| <i>C. bactrianus</i>   | ND1             | 15    | V          | 0.515  | -0.46        | 1   | n.s     |
|                        | ND2             | 243   | L          | 0.627  | 0.07         | 1   | n.s     |
|                        | COX3            | 41    | I          | 0.543  | 0            | 1   | n.s     |
|                        |                 | 165   | I          | 0.723  | 0            | 1   | n.s     |
|                        | ND3             | 86    | T          | 0.844  | 0            | 1   | n.s     |
|                        | ND4             | 60    | S          | 0.572  | 0            | 1   | n.s     |
|                        | ND5             | 161   | A          | 0.701  | 0            | 1   | n.s     |
|                        |                 | 543   | T          | 0.634  | 0            | 1   | n.s     |
|                        |                 | 592   | I          | 0.697  | 0            | 1   | n.s     |
|                        |                 | 595   | I          | 0.56   | 0            | 1   | n.s     |
|                        | <i>C. ferus</i> | ND2   | 62         | T      | 0.576        | 0   | 1       |
| ATP8                   |                 | 44    | T          | 0.758  | 0            | 1   | n.s     |
| ND4                    |                 | 48    | N          | 0.704  | 0            | 1   | n.s     |
|                        |                 | 435   | A          | 0.693  | 0            | 1   | n.s     |
| ND5                    |                 | 470   | N          | 0.677  | 0            | 1   | n.s     |
|                        |                 | 495   | L          | 0.678  | 0            | 1   | n.s     |
|                        |                 | 536   | V          | 0.675  | 0            | 1   | n.s     |
| CYTB                   |                 | 4     | I          | 0.638  | 0            | 1   | n.s     |
|                        |                 | 14    | M          | 0.529  | 0            | 1   | n.s     |
|                        |                 | 39    | V          | 0.598  | 0            | 1   | n.s     |
|                        |                 | 349   | M          | 0.618  | 0            | 1   | n.s     |
|                        | 353             | V     | 0.654      | 0      | 1            | n.s |         |
| <i>Camelus</i> lineage | ND2             | 227   | L          | 0.649  | 0            | 1   | n.s     |
|                        |                 | 347   | Y          | 0.625  | 0            | 1   | n.s     |
|                        | COX2            | 94    | V          | 0.589  | -0.55        | 1   | n.s     |
|                        | ATP8            | 22    | V          | 0.584  | 0.94         | 1   | n.s     |
|                        |                 | 34    | P          | 0.546  | 0.94         |     | n.s     |
|                        |                 | 38    | S          | 0.648  | 0.94         |     | n.s     |
|                        | COX3            | 40    | S          | 0.944  | 2.80         | 1   | n.s     |
|                        | ND3             | 19    | I          | 0.537  | 0.95         | 1   | n.s     |
|                        | ND4             | 4     | Y          | 0.514  | 3.84         | 1   | n.s     |
|                        |                 | 50    | L          | 0.848  | 3.84         |     | n.s     |
|                        |                 | 82    | H          | 0.953* | 3.84         |     | n.s     |
|                        |                 | 183   | V          | 0.918  | 3.84         |     | n.s     |
|                        |                 | 187   | H          | 0.644  | 3.84         |     | n.s     |
|                        |                 | 248   | L          | 0.673  | 3.84         |     | n.s     |
|                        |                 | 438   | S          | 0.508  | 3.84         |     | n.s     |
|                        | 458             | L     | 0.636      | 3.84   |              | n.s |         |
| ND5                    | 183             | A     | 0.766      | 0.11   | 1            | n.s |         |
|                        | 432             | N     | 0.838      | 0.11   |              | n.s |         |

111 Table S14: Fixed nonsynonymous substitutions between species-specific lineages of camels, their peptide chain locations, inferred  
 112 ancestral states, and impact on local physicochemical properties are shown. Pairwise comparisons between three camel species  
 113 (dromedary, domestic and wild Bactrian) are shown with abbreviations db, df and bf. The ancestral states of the amino acid changes were  
 114 inferred using MEGA6. Magnitude of the amino acid changes (categories  $\geq 6$ ) and the affected physicochemical properties are inferred  
 115 with TreeSAAP (v.3.2): Increase ( $\uparrow$ ) and decrease ( $\downarrow$ ) in amino acid properties in a given branch is indicated.  
 116

| Gene | Amino Acid site | Location         | Ancestral state | <i>C. dromedarius</i> | <i>C. bactrianus</i> | <i>C. ferus</i> | Magnitude of change                                  |                                              |                                             |
|------|-----------------|------------------|-----------------|-----------------------|----------------------|-----------------|------------------------------------------------------|----------------------------------------------|---------------------------------------------|
|      |                 |                  |                 |                       |                      |                 | <i>C. dromedarius</i> --><br><i>C. bactrianus</i>    | <i>C. dromedarius</i> --><br><i>C. ferus</i> | <i>C. bactrianus</i> --><br><i>C. ferus</i> |
| ATP8 | 36              | Nontransmembrane | Ala             | Asp                   | Ala                  | Ala             | 7 *** $\downarrow$ , $P_r$                           | 7 *** $\downarrow$ , $P_r$                   |                                             |
| ATP6 | 47              | Nontransmembrane | His             | His                   | Tyr                  | Tyr             | 7 *** $\downarrow$ , $\alpha_m$                      | 7 *** $\downarrow$ , $\alpha_m$              |                                             |
|      | 51              | Nontransmembrane | Arg             | Gln                   | Arg                  | Arg             | 7 *** $\uparrow$ , $pHi$                             | 7 *** $\uparrow$ , $pHi$                     |                                             |
| ND3  | 30              | Nontransmembrane | Ile             | Thr                   | Ile                  | Ile             | 8 *** $\uparrow$ , $R_a$<br>8 *** $\uparrow$ , $H_p$ |                                              |                                             |
|      | 87              | Transmembrane    | Thr             | Thr                   | Ile                  | Thr             | 8 *** $\uparrow$ , $R_a$<br>8 *** $\uparrow$ , $H_p$ |                                              | 8 *** $\downarrow$ , $R_a$                  |
| ND5  | 69              | Nontransmembrane | Ile             | Ile                   | Met                  | Met             |                                                      | 8 *** $\uparrow$ , $pK'$                     |                                             |
|      | 130             | Transmembrane    | Ile             | Val                   | Ile                  | Ile             |                                                      | 8 *** $\downarrow$ , $pK'$                   |                                             |
|      | 162             | Nontransmembrane | Ala             | Ala                   | Thr                  | Ala             | 6 *** $\downarrow$ , $P_a$                           |                                              |                                             |
|      | 195             | Nontransmembrane | Thr             | Thr                   | Ala                  | Ala             | 6 *** $\uparrow$ , $P_a$                             |                                              |                                             |
|      | 214             | Transmembrane    | Met             | Ile                   | Met                  | Met             |                                                      | 8 *** $\uparrow$ , $pK'$                     |                                             |
|      | 272             | Transmembrane    | Thr             | Met                   | Thr                  | Thr             | 6 *** $\downarrow$ , $P_a$                           |                                              |                                             |
|      | 375             | Transmembrane    | Ile             | Ile                   | Val                  | Val             |                                                      | 8 *** $\uparrow$ , $pK'$                     |                                             |
|      | 394             | Nontransmembrane | Met             | Thr                   | Met                  | Met             | 6 *** $\uparrow$ , $P_a$                             |                                              |                                             |
|      | 398             | Nontransmembrane | Ala             | Ala                   | Thr                  | Thr             | 6 *** $\downarrow$ , $P_a$                           |                                              |                                             |
|      | 414             | Transmembrane    | Ile             | Val                   | Ile                  | Ile             |                                                      | 8 *** $\downarrow$ , $nK'$                   |                                             |



|     |     |               |     |     |     |     |  |                         |  |
|-----|-----|---------------|-----|-----|-----|-----|--|-------------------------|--|
|     | 599 | Transmembrane | Ile | Ile | Ala | Ala |  | 8 <sup>***</sup> ↑, pK' |  |
| ND6 | 12  | Transmembrane | Ile | Ile | Ile | Val |  | 8 <sup>***</sup> ↑, pK' |  |
|     | 18  | Transmembrane | Ile | Ile | Val | Val |  | 8 <sup>***</sup> ↑, pK' |  |
|     | 102 | Transmembrane | Ser | Ile | Ser | Ala |  | 8 <sup>***</sup> ↑, pK' |  |
|     | 105 | Transmembrane | Val | Ile | Val | Val |  | 8 <sup>***</sup> ↑, pK' |  |

117  
118  $P_{\alpha}$ : Alpha-helical tendencies, pK': Equilibrium constant (ionization of COOH),  $P_r$ : Polar requirement,  $H_p$ : Surrounding hydrophobicity,  
119  $\alpha_m$ : Power to be at the middle of alpha-helix,  $pHi$ : Isoelectric point,  $R_a$ : Solvent accessible reduction ratio. The location of the peptides  
120 containing the amino acid changes were predicted by the program Phobius. The  $P$ -values with asterisk are significant with following  
121 significant levels \*\*\*  $P < 0.001$ .
